# Supplementary material for: Surfactant-additive-free synthesis of 3D anatase TiO2 hierarchical architectures with enhanced photocatalytic activity
Source: Royal Society of Chemistry journal article supplement (doi:10.1039/c3ra42314j), 2013-01-01
Supplement: c3ra42314j.pdf [file c3ra42314j.pdf]

*Supporting information*

**Template-free synthesis of 3D anatase TiO<sub>2</sub> hierarchical architectures  
with enhanced photocatalytic activity**

Qifeng Chen<sup>\*a,b</sup>, Chuncheng Chen<sup>b</sup>, Hongwei Ji<sup>b</sup>, Wanhong Ma<sup>b</sup>, Jincui Zhao<sup>\*b</sup>

- Figure S1 HRTEM images of nanoleaves of flower-like anatase TiO<sub>2</sub> assembly.
- Figure S2 HRTEM images of nanoleaf TiO<sub>2</sub>.
- Figure S3 TEM images of the spindle shaped TiO<sub>2</sub> mesocrystal, which was synthesized under a TTIP concentration of 0.15 M.
- Figure S4 XRD patterns of the products after various reaction periods, using TTIP and HAC as original reactants.
- Figure S5 TEM images of FAT-160, the precipitate obtained after mixture of TTIP and HAC (a), the corresponding pattern of SAED (b), solvothermally treated for 12 h (c), and the corresponding SAED (d).
- Figure S6 the SEM images of the flower-like TiO<sub>2</sub> 3D structures: (a-c) as-synthesized materials, and (d-e) the products originated from the as-synthesized materials calcined at 500 °C.
- Figure S7 SEM image of a single FAT-180 assembly, which obviously shows the composed flake shaped leaves.
- Figure S8 SEM image of a broken flower-like assembly, which clearly exhibits subunits of the flake shaped leaves.
- Figure S9 SEM images of the flower-like as synthesized products hydrothermal treated at 160 °C in deionized water.
- Figure S10 Morphology of the products synthesized at higher concentration ( $0.10 \text{ M} < C_{\text{TTIP}} < 0.40 \text{ M}$ ) of TTIP in acetic acid.
- Figure S11 TEM (a) and HRTEM images of spindle shaped assemblies (b), and N<sub>2</sub> adsorption/desorption isotherms of spindle shaped nanoporous TiO<sub>2</sub> mesocrystals (c).
- Figure S12 TEM images of various photocatalysts with hierarchical architectures load with 1wt% Pt as cocatalyst. (a-b) flower-like TiO<sub>2</sub>, (c-d) spindle shaped TiO<sub>2</sub>, and (e-f) irregular shaped TiO<sub>2</sub> nanoparticles.
- Figure S13 Hydroxylation of TA (Terephthalic acid), using various TiO<sub>2</sub> photocatalysts in aqueous suspension.
- Figure S14 HRTEM images of the FAT-400, FAT-500, and FAT-600.
- Figure S15 TEM images of the ground FAT-500 loaded with 1% Pt.
- Figure S16 Photocatalytic hydrogen evolution performed on the ground FAT-500 compared with that of FAT-500 loaded with 1% Pt, respectively.
- Table S1 Crystallite size of the TiO<sub>2</sub> nanoparticles obtained at various temperatures

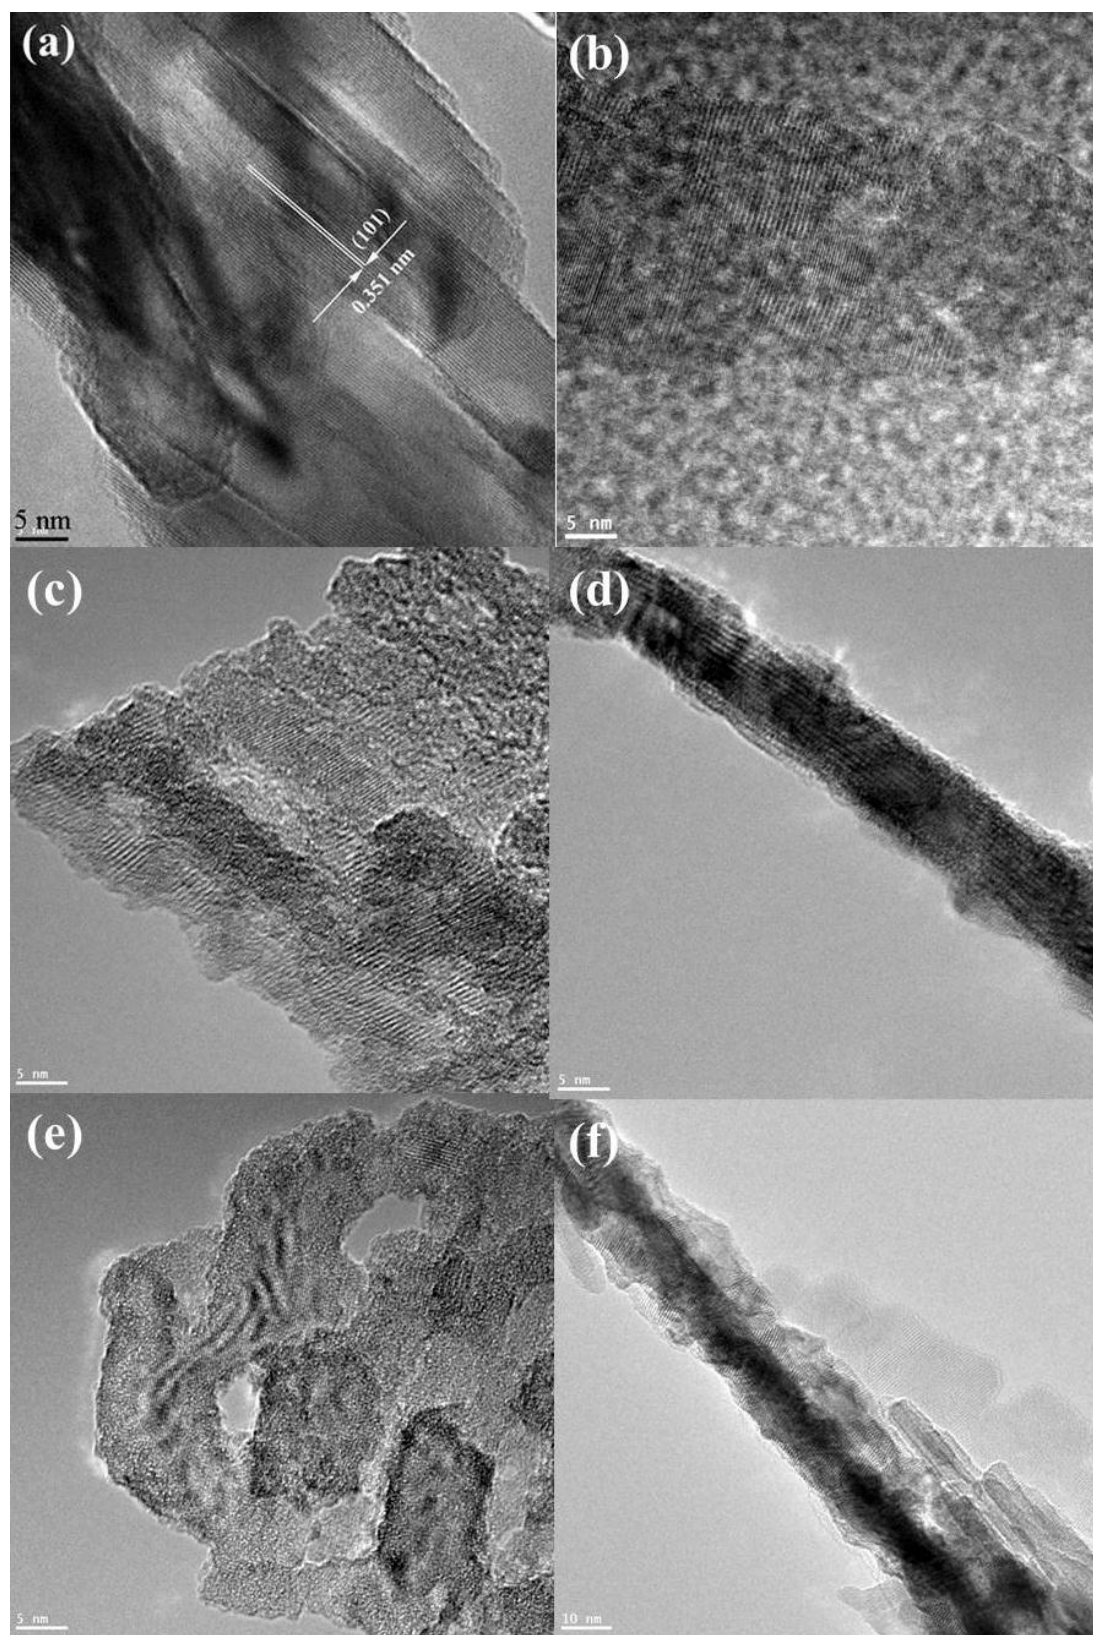

Figure S1 HRTEM images of nanoleaves of flower-like anatase TiO<sub>2</sub> assembly.



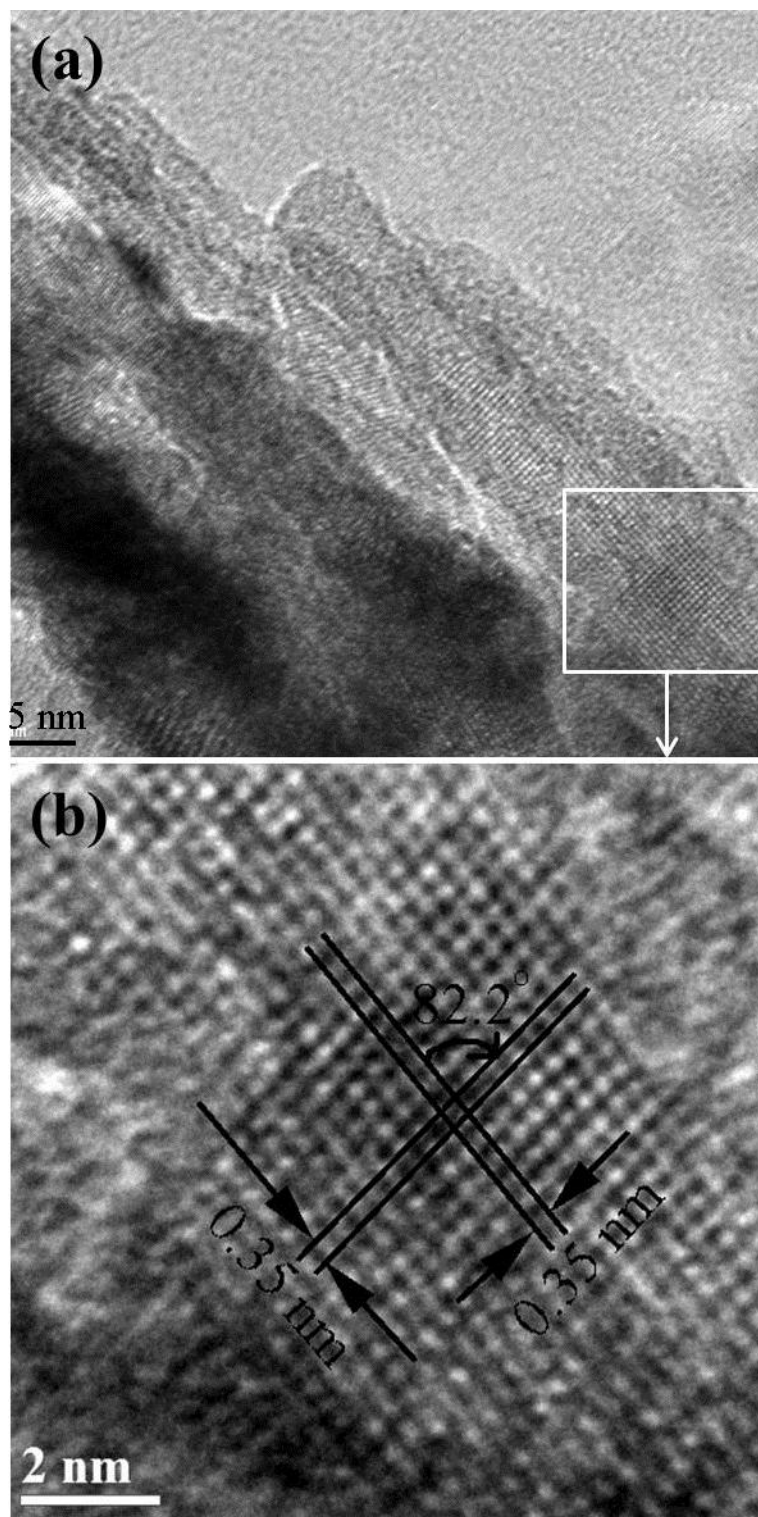

Figure S2 HRTEM images of nanoleaf  $\text{TiO}_2$ .

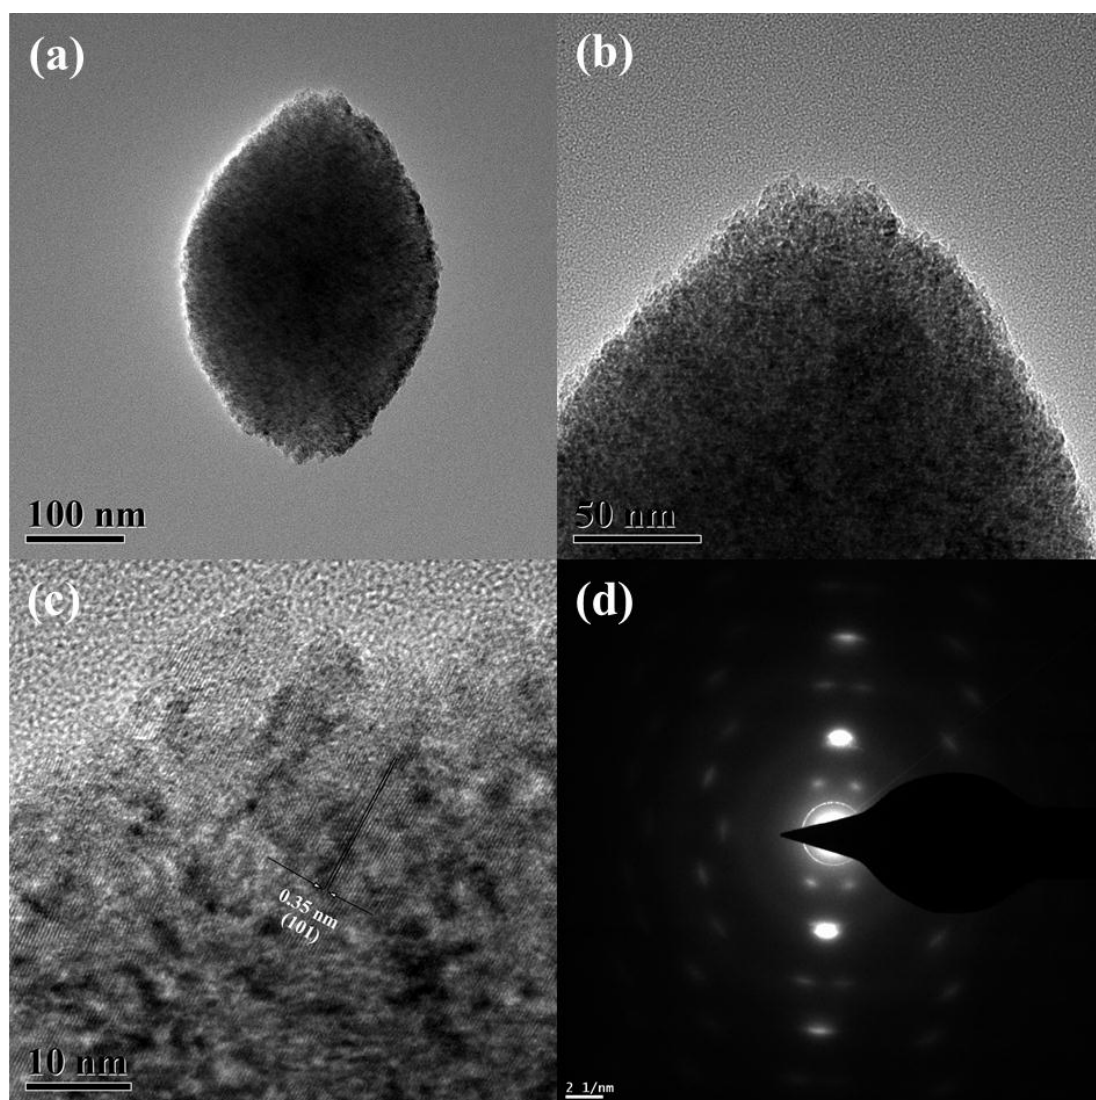

Figure S3 TEM images of the spindle shaped  $\text{TiO}_2$  mesocrystal, which was synthesized under a TTIP concentration of 0.15 M.

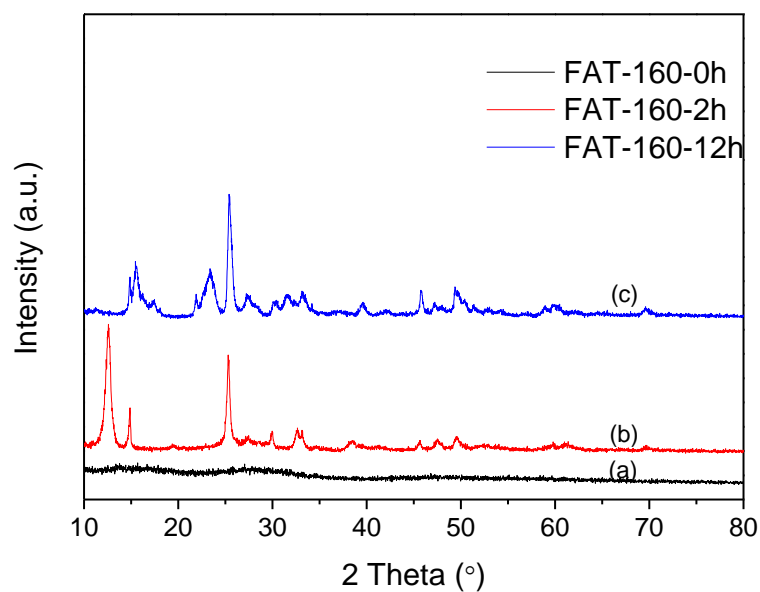

Figure S4 XRD patterns of the products after various reaction periods, using TTIP and HAC as original reactants.

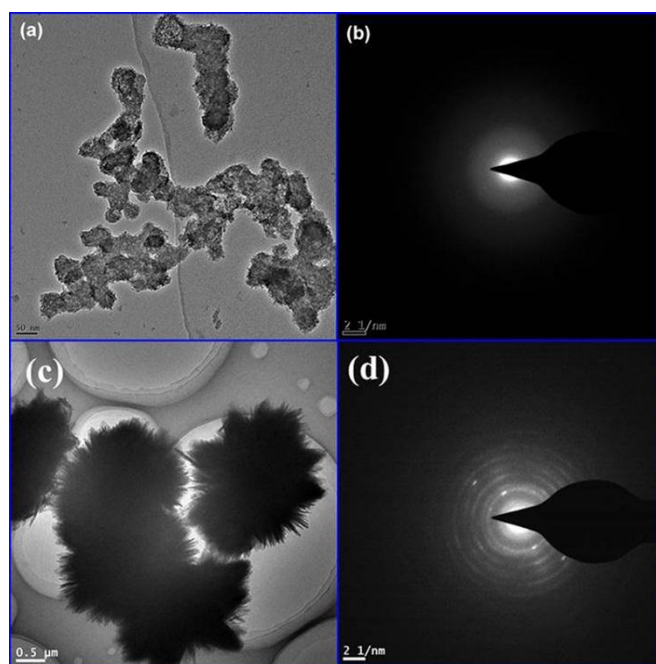

Figure S5 TEM images of FAT-160, the precipitate obtained after mixture of TTIP and HAC (a), the corresponding pattern of SAED (b), solvothermally treated for 12 h (c), and the corresponding SAED (d).



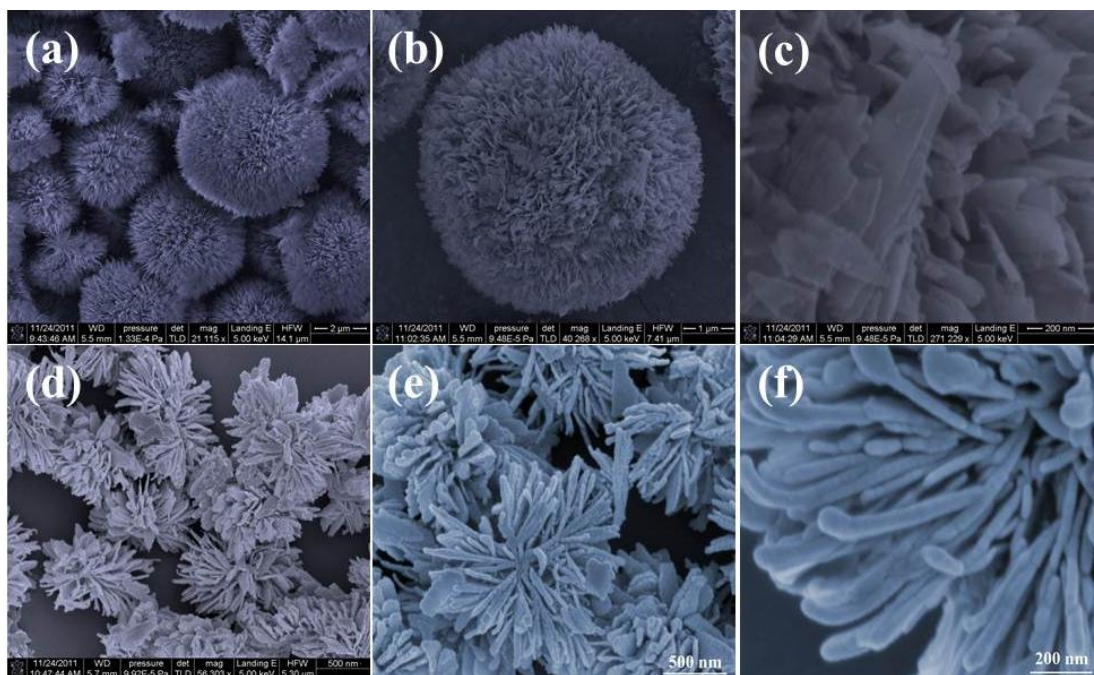

Figure S6 the SEM images of the flower-like  $\text{TiO}_2$  3D structures: (a-c) as-synthesized materials, and (d-e) the products originated from the as-synthesized materials calcined at 500 °C.

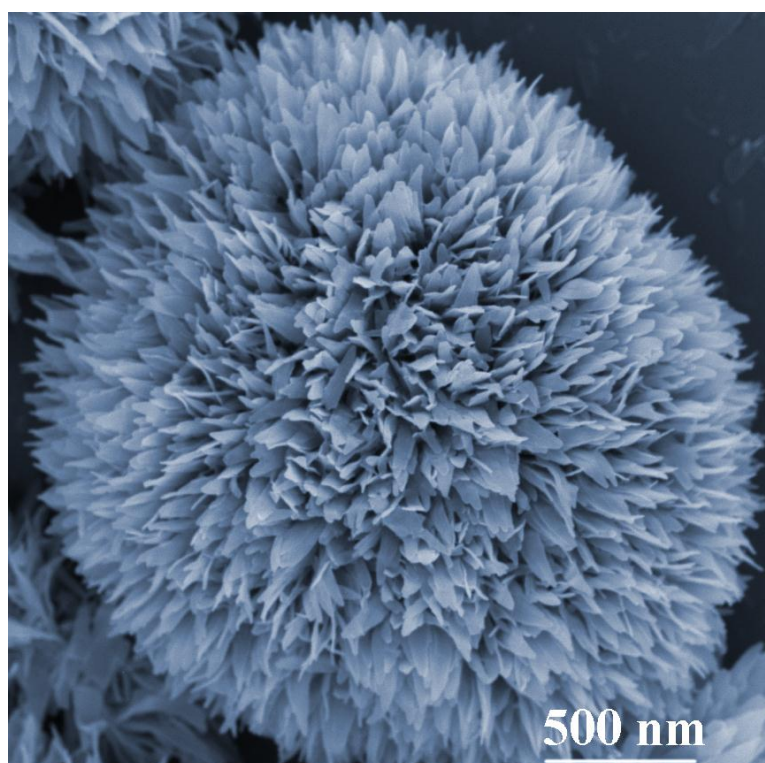

Figure S7 SEM image of a single FAT-180 assembly, which obviously shows the composed flake shaped leaves.

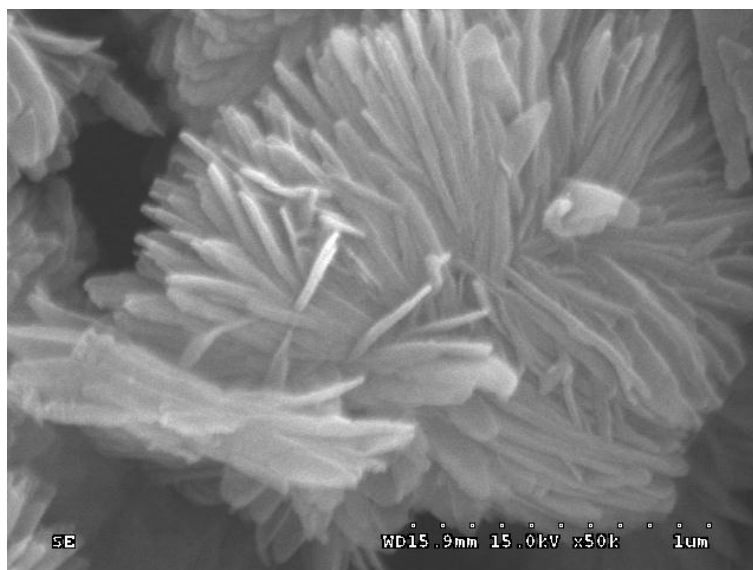

Figure S8 SEM image of a broken flower-like assembly, which clearly exhibits subunits of the flake shaped leaves.

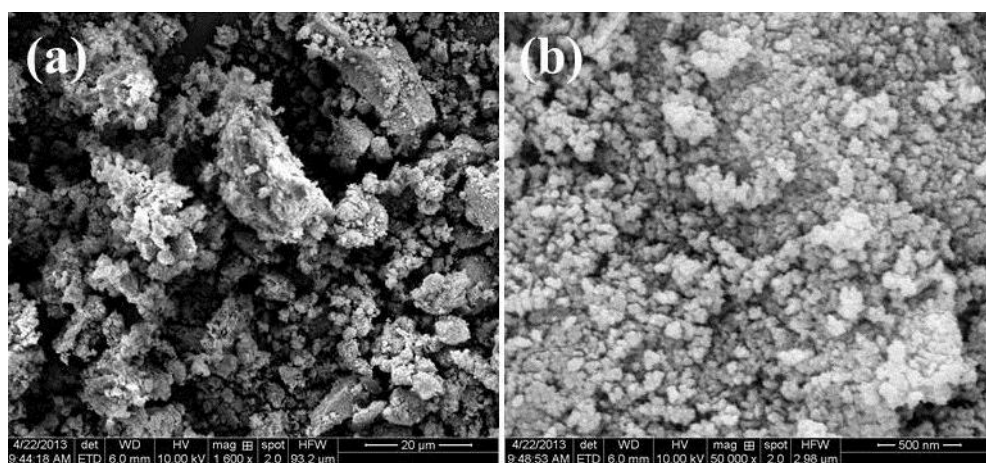

Figure S9 SEM images of the flower-like as synthesized products hydrothermally treated at 160 °C in deionized water.

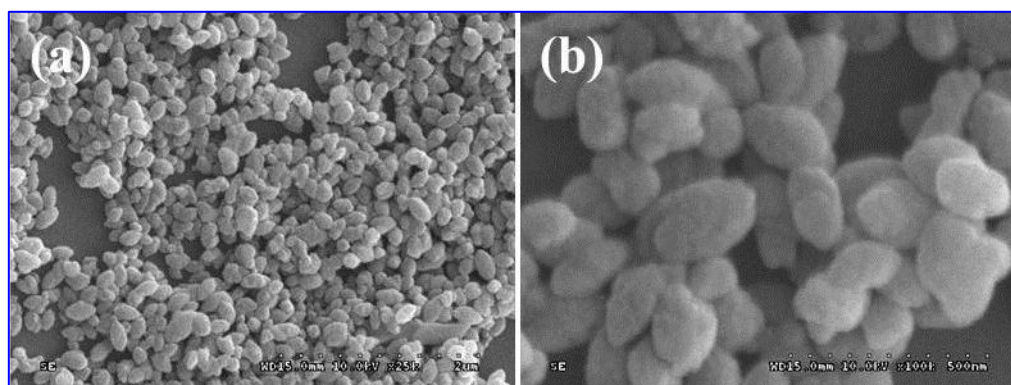

Figure S10 Morphology of the products synthesized at higher concentration ( $0.10 \text{ M} < C_{\text{TTIP}} < 0.40 \text{ M}$ ) of TTIP in acetic acid.



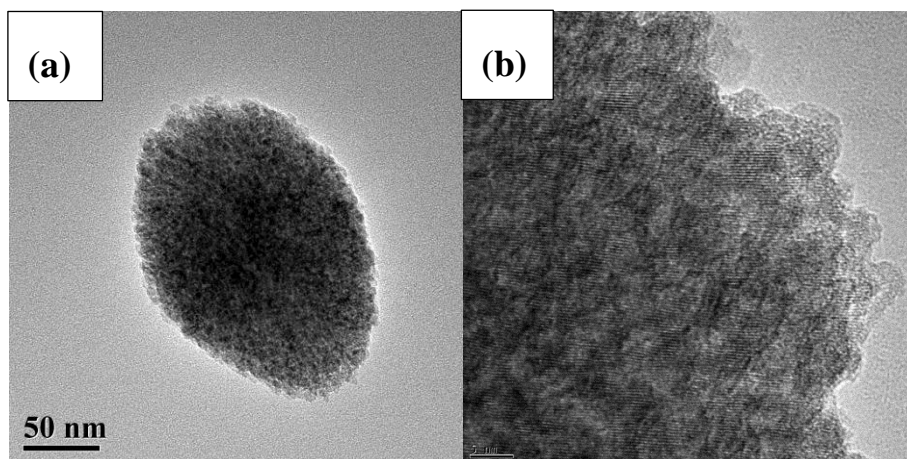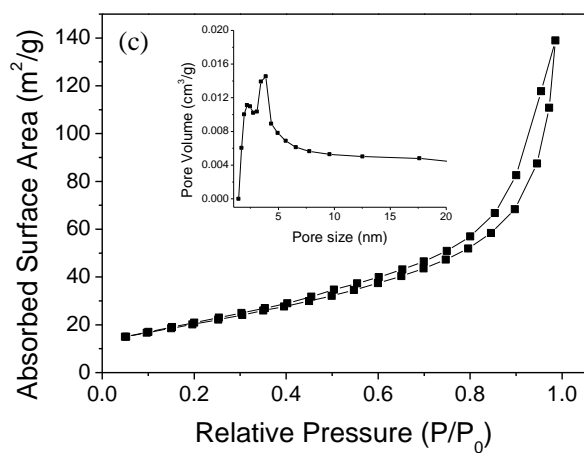

Figure S11 TEM (a) and HRTEM images of spindle shaped assemblies (b), and N<sub>2</sub> adsorption/desorption isotherms of spindle shaped nanoporous TiO<sub>2</sub> mesocrystals (c).

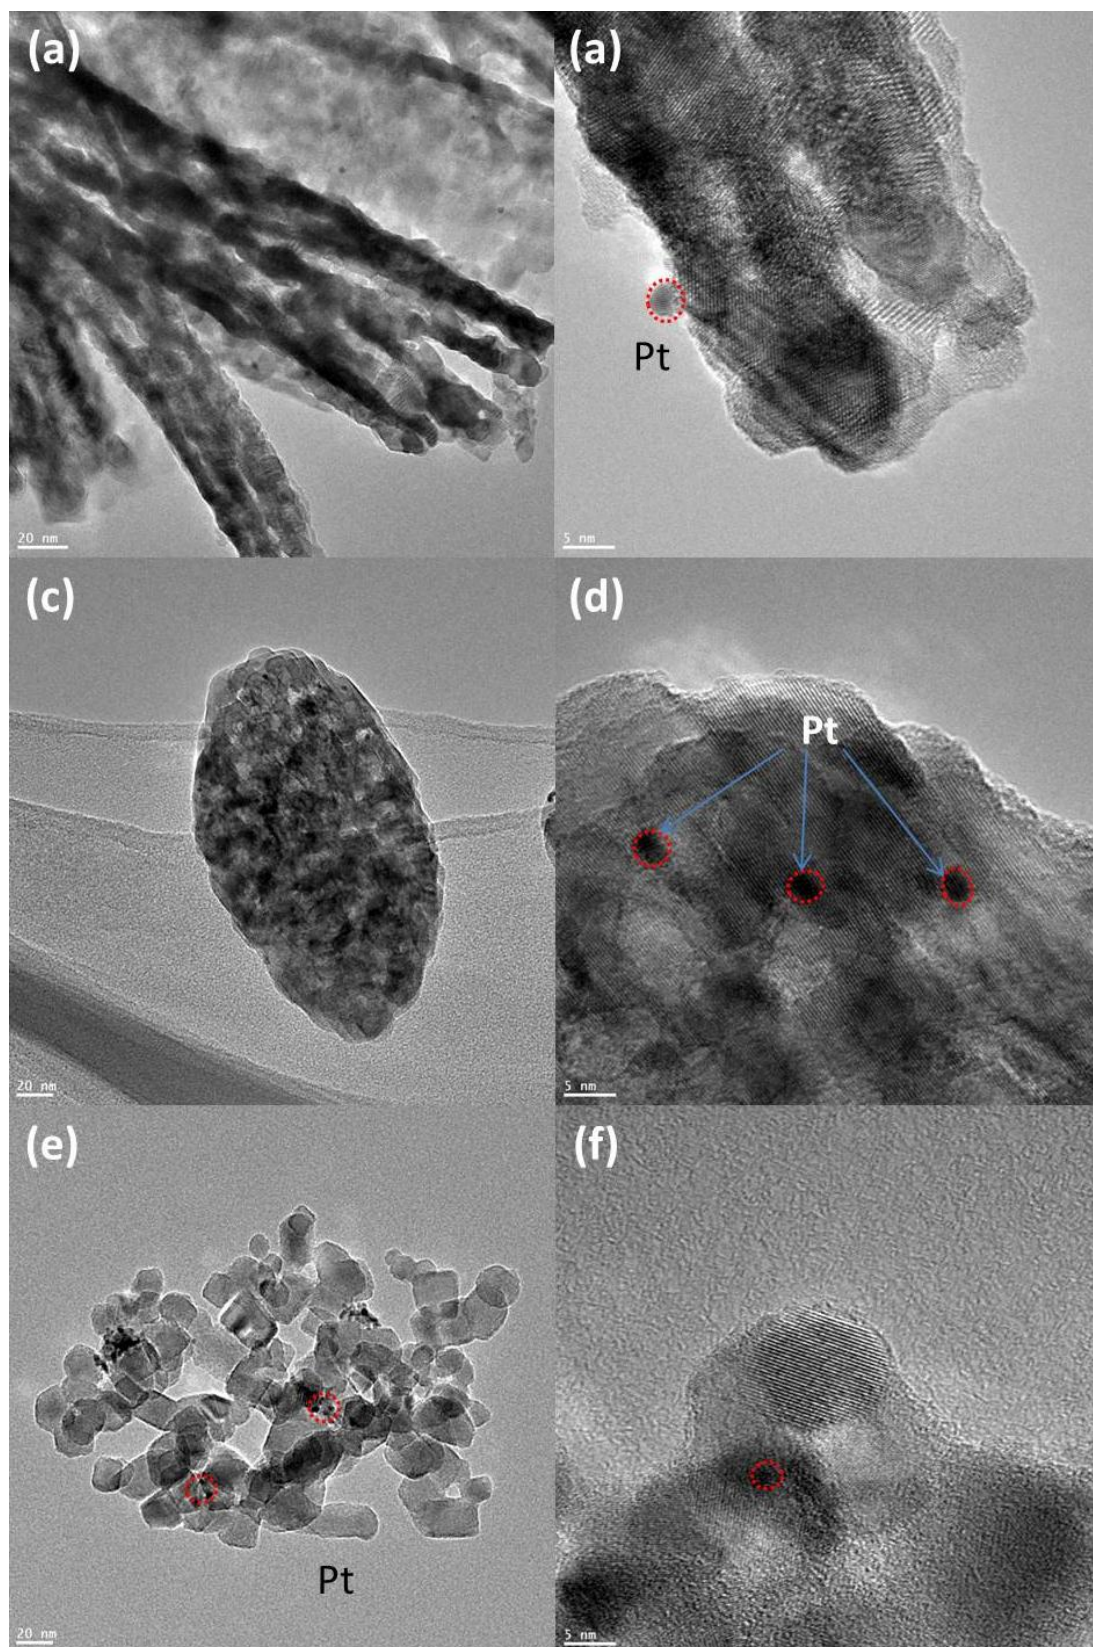

Figure S12 TEM images of various photocatalysts with hierarchical architectures load with 1wt% Pt as cocatalyst. (a-b) flower-like  $\text{TiO}_2$ , (c-d) spindle shaped  $\text{TiO}_2$ , and (e-f) irregular shaped  $\text{TiO}_2$  nanoparticles.

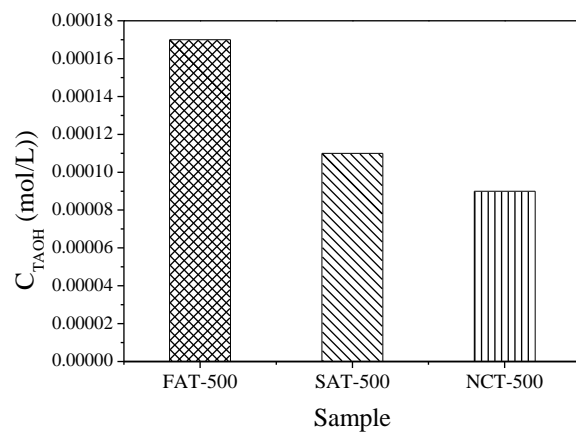

Figure S13 Hydroxylation of TA (Terephthalic acid), using various  $TiO_2$  photocatalysts in aqueous suspension.

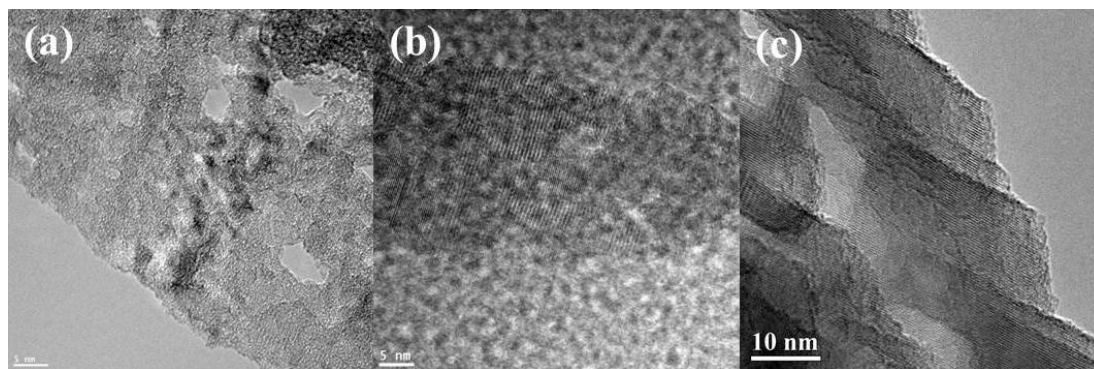

Figure S14 HRTEM images of the FAT-400, FAT-500, and FAT-600.



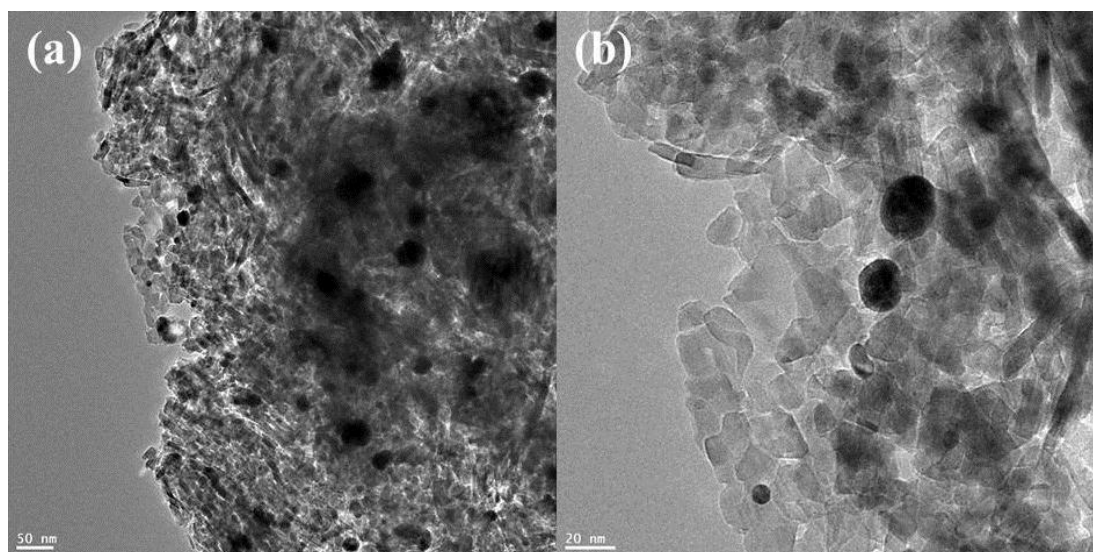

Figure S15 TEM images of the ground FAT-500 loaded with 1% Pt.

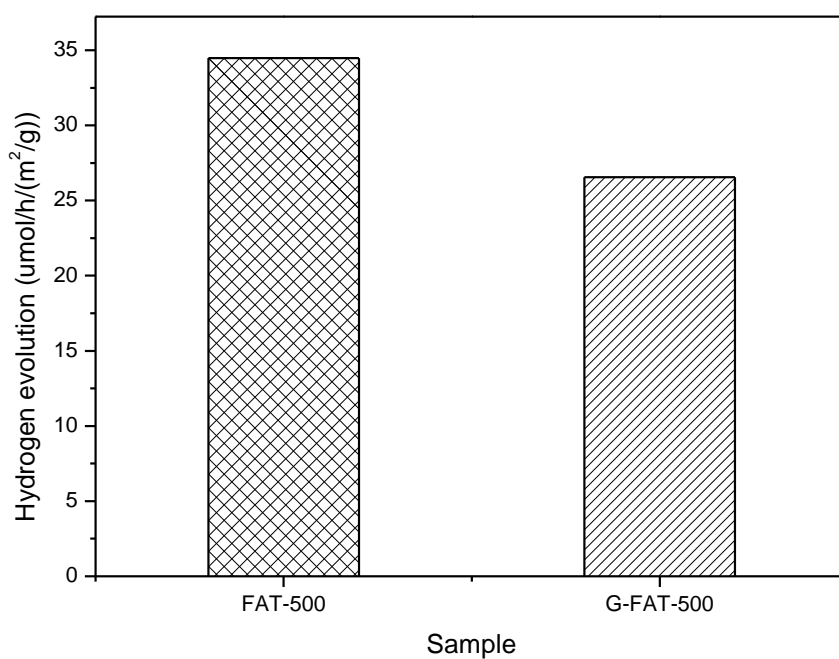

Figure S16 Photocatalytic hydrogen evolution performed on the ground FAT-500 compared with that of FAT-500 loaded with 1% Pt, respectively.

Table S1 Crystallite size of the TiO<sub>2</sub> nanoparticles obtained at various temperatures

| Sample                | FAT-160 | FAT-400 | FAT-500 | FAT-600 |
|-----------------------|---------|---------|---------|---------|
| Temperature (°C)      | 160     | 400     | 500     | 600     |
| Crystallite size (nm) | 8       | 13      | 18      | 22      |
